# Supplementary material
Source: Elsevier journal article supplement (https://www.sciencedirect.com/science/article/pii/S2174204918300746)
Supplement: mmc1 [file S2174204918300746:mmc1.doc]

**Supplementary Tables**

Supplementary Table 1. Detailed characteristics of the whole sample and of the subgroups with and without events at 36 months of follow-up.

| Variable | All patients | Events*  (n=54) | No events*  (n=209) | p |
| --- | --- | --- | --- | --- |
| Clinical an electrocardiographic data |  |  |  |  |
| Age (years), mean (SD) | 54 (12) | 54 (12) | 53 (12) | 0.718 |
| Male, n (%) | 197 (75) | 44 (81) | 153 (73) | 0.141 |
| Diabetes, n (%) | 54 (21) | 8 (15) | 46 (22) | 0.248 |
| Hypertension, n (%) | 150 (57) | 33 (61) | 117 (56) | 0.602 |
| Dyslipidaemia, n (%) | 138 (52) | 29 (54) | 109 (52) | 0.961 |
| Smoking, n (%) | 96 (37) | 27 (50) | 69 (33) | 0.033 |
| Body mass index (kg/m2), mean (SD) | 27 (4) | 26 (5) | 27 (4) | 0.265 |
| Ischemic etiology, n (%) | 97 (37) | 28 (52) | 69 (33) | 0.009 |
| NYHA class, n (%) |  |  |  |  |
| - II | 200 (76) | 28 (52) | 172 (82) | <0.001 |
| - III | 63 (24) | 26 (48) | 37 (18) |
| Sinus rhythm, n (%) | 214 (81) | 36 (67) | 178 (85) | 0.003 |
| Intraventricular conduction abnormality, n (%) | 104 (40) | 20 (37) | 84 (40) | 0.756 |
| Loop diuretic, n (%) | 234 (89) | 54 (100) | 180 (86) | 0.002 |
| Furosemide dose (mg/day), median (25th percentile-75th percentile) | 40 (20-80) | 80 (40-80) | 40 (20-60) | <0.001 |
| ACEi / ARA, n (%) | 255 (97) | 54 (100) | 201 (96) | 0.309 |
| Betablocker, n (%) | 233 (89) | 48 (89) | 185 (89) | 0.999 |
| Aldosterone receptor inhibitor, n (%) | 176 (67) | 43 (80) | 133 (64) | 0.035 |
| Nitrate, n (%) | 47 (18) | 17 (31) | 30 (14) | 0.009 |
| Antiplatelet, n (%) | 146 (56) | 33 (61) | 113 (54) | 0.443 |
| Oral anticoagulant, n (%) | 72 (27) | 15 (28) | 57 (27) | 0.999 |
| Statin, n (%) | 124 (47) | 27 (50) | 97 (46) | 0.760 |
| Baseline CRT, n (%) | 72 (27) | 14 (26) | 58 (28) | 0.935 |
| Baseline ICD, n (%) | 85 (32) | 18 (33) | 67 (32) | 0.979 |
| CRT (total), n (%) | 82 (31) | 17 (31) | 65 (31) | 0.948 |
| ICD (total), n (%) | 96 (37) | 21 (39) | 75 (36) | 0.682 |
| Laboratorial data |  |  |  |  |
| Haemoglobin (g/L), mean (SD) | 13.4 (2.2) | 13.2 (1.9) | 13.5 (2.3) | 0.410 |
| Urea (mg/dL), mean (SD) | 49.0 (23.1) | 60.1 (31.2) | 46.2 (19.0) | <0.001 |
| Creatinine (mg/dL), mean (SD) | 1.1 (0.3) | 1.2 (0.3) | 1.1 (0.3) | <0.001 |
| Glomerular filtration rate (mL/min/1.73 m2), mean (SD) | 73.6 (30.4) | 62.1 (29.3) | 76.5 (30.5) | 0.002 |
| Sodium (mEq/L), mean (SD) | 137 (3) | 134 (4) | 137 (3) | <0.001 |
| Potassium (mEq/L), mean (SD) | 4.5 (0.5) | 4.4 (0.6) | 4.5 (0.4) | 0.111 |
| Aspartate transaminase (U/L), median (25th percentile-75th percentile) | 26 (21-31) | 26 (25-35) | 26 (21-31) | 0.175 |
| Alanine transaminase (U/L), median (25th percentile-75th percentile) | 26 (20-35) | 27 (22-31) | 26 (19-35) | 0.474 |
| Gammaglutamyl transferase (U/L), mean (SD) | 56 (57) | 95 (86) | 47 (44) | <0.001 |
| Lactate dehydrogenase (U/L), mean (SD) | 429 (138) | 498 (202) | 411 (109) | <0.001 |
| Bilirubin (total) (mg/dL), mean (SD) | 0.9 (0.5) | 1.2 (0.6) | 0.8 (0.4) | 0.001 |
| Albumin (g/L), mean (SD) | 3.9 (0.5) | 3.8 (0.5) | 3.9 (0.5) | 0.456 |
| C-reactive protein (mg/L), mean (SD) | 1.0 (2.0) | 0.8 (1.0) | 1.1 (2.3) | 0.546 |
| NT-proBNP (pg/mL), mean (SD) | 2304 (2821) | 4269 (4724) | 1898 (2029) | <0.001 |
| Elevated troponin T levels, n (%) | 37 (14) | 13 (24) | 24 (11) | 0.004 |
| Echocardiographic data |  |  |  |  |
| LVEDD (mm/m2), mean (SD) | 39 (6) | 42 (7) | 39 (5) | 0.006 |
| LVEF (%), mean (SD) | 28 (7) | 23 (6) | 28 (8) | <0.001 |
| Moderate or severe mitral regurgitation, n (%) | 42 (16) | 9 (17) | 33 (16) | 0.988 |
| E/A, mean (SD) | 0.8 (1.2) | 1.0 (1.5) | 0.8 (1.1) | 0.313 |
| Right ventricular systolic dysfunction, n (%) | 42 (16) | 19 (35) | 23 (11) | <0.001 |
| TR max (m/s), mean (SD) | 2.8 (1.3) | 3.0 (1.2) | 2.7 (1.4) | 0.019 |
| Cardiopulmonary exercise testing data |  |  |  |  |
| Duration (min), mean (SD) | 10 (4) | 7 (4) | 11 (4) | <0.001 |
| Ischemia, n (%) | 3 (1) | 1 (2) | 2 (1) | 0.999 |
| Baseline HR (min-1), mean (SD) | 83 (16) | 81 (15) | 84 (16) | 0.263 |
| Peak HR (min-1), mean (SD) | 139 (27) | 125 (25) | 141 (27) | <0.001 |
| HR recovery (1st minute) (min-1), median (25th percentile-75th percentile) | 18 (13-29) | 13 (8-18) | 19 (15-30) | <0.001 |
| HR reserve (maximum minus resting HR) (min-1), median (25th percentile-75th percentile) | 20 (2-42) | 37 (24-49) | 18 (2-38) | 0.048 |
| Baseline SBP (mmHg), median (25th percentile-75th percentile) | 110 (107-120) | 110 (110-119) | 115 (110-120) | 0.009 |
| Peak SBP (mmHg), median (25th percentile-75th percentile) | 150 (130-170) | 130 (120-150) | 160 (140-170) | <0.001 |
| Baseline double product (mmHg/min), mean (SD) | 9553 (2238) | 8882 (2014) | 9695 (2242) | 0.015 |
| Peak double product (mmHg/min), mean (SD) | 21408 (6248) | 17455 (5203) | 22247 (6430) | <0.001 |
| Δ double product (mmHg/min), mean (SD) | 11911 (5374) | 8564 (4443) | 12619 (5547) | <0.001 |
| Peak respiratory exchange ratio, mean (SD) | 1.10 (0.10) | 1.13 (0.10) | 1.09 (0.09) | 0.008 |
| pVO2 (mL/kg/min), mean (SD) | 20.0 (5.3) | 15.6 (4.7) | 21.1 (5.7) | <0.001 |
| pVO2 (% predicted), mean (SD) | 67 (15) | 51 (14) | 71 (16) | <0.001 |
| Circulatory power (mmHg.mL/kg/min), mean (SD) | 3115 (1123) | 2185 (895) | 3289 (1132) | <0.001 |
| Peak oxygen pulse (% predicted), mean (SD) | 91 (30) | 74 (23) | 95 (30) | <0.001 |
| OUES (SD) | 1.8 (0.6) | 1.4 (0.4) | 1.9 (0.6) | <0.001 |
| AT (min), mean (SD) | 7 (3) | 5 (3) | 8 (3) | <0.001 |
| AT-VO2 (mL/kg/min), mean (SD) | 16.1 (4.0) | 12.6 (3.6) | 17.0 (4.1) | <0.001 |
| AT-VO2 / pVO2 (%), mean (SD) | 81 (9) | 81 (9) | 81 (9) | 0.974 |
| Peak VE/VO2, mean (SD) | 25 (11) | 35 (16) | 23 (7) | <0.001 |
| VE/VCO2 slope, mean (SD) | 31 (7) | 40 (9) | 29 (5) | <0.001 |
| Peak VE/VCO2, mean (SD) | 35 (8) | 42 (10) | 33 (7) | <0.001 |
| AT VE/VCO2, mean (SD) | 33 (7) | 40 (9) | 31 (6) | <0.001 |
| VE/VCO2 slope/pVO2 (mL/kg/min)-1, mean (SD) | 1.7 (0.9) | 2.9 (1.4) | 1.5 (0.6) | <0.001 |
| VE/VCO2 slope/circulatory power (mmHg.mL/kg/min)-1, mean (SD) | 1.2 (0.8) | 2.3 (1.3) | 1.0 (0.6) | <0.001 |
| Baseline PETCO2 (kPa), mean (SD) | 4.4 (0.6) | 4.2 (0.7) | 4.4 (0.6) | 0.017 |
| AT PETCO2 (kPa), mean (SD) | 4.9 (0.8) | 4.3 (0.8) | 5.0 (0.7) | <0.001 |
| Peak PETCO2 (kPa), mean (SD) | 4.4 (0.8) | 3.9 (0.8) | 4.6 (0.8) | <0.001 |
| Δ PETCO2 (kPa), mean (SD) | 0.5 (0.4) | 0.1 (0.4) | 0.6 (0.4) | <0.001 |
| Peak respiratory rate (min-1) , mean (SD) | 37 (8) | 37 (8) | 37 (8) | 0.463 |
| Score |  |  |  |  |
| Heart Failure Survival Score, mean (SD) | 8.7 (1.0) | 7.9 (0.9) | 8.8 (0.9) | <0.001 |

* Cardiac death, urgent heart transplantation or mechanical circulatory support up to 36 months of follow-up.

ACEi – angiotensin converter enzyme inhibitor; ARA – angiotensin II receptor antagonist; AT – anaerobic threshold; circulatory power – peak oxygen consumption x systolic blood pressure product; CRT – cardiac resynchronization therapy with or without defibrillator; double product – systolic blood pressure x heart rate product; E/A – mitral inflow E wave velocity / A wave velocity ratio; HR – heart rate; HR recovery (1st minute) – peak heart rate minus heart rate at first minute of recovery; ICD – implantable cardioverter defibrillator; LVEDD – left ventricular end-diastolic diameter; LVEF – left ventricular ejection fraction; min – minute; NT-proBNP – N-terminal pro-B-type natriuretic peptide; NYHA – New York Heart Association; OUES – oxygen uptake efficiency slope15; peak oxygen pulse – peak oxygen consumption / heart rate ratio; PETCO2 – end-tidal carbon dioxide partial pressure; pVO2 – peak oxygen consumption; pVO2 (% predicted) – based on Wasserman and Hansen formula; respiratory exchange ratio – ratio between carbon dioxide production and oxygen consumption; SD – standard deviation; SBP – systolic blood pressure; TR max – maximal tricuspid regurgitation velocity; VCO2 – carbon dioxide production; VE – minute ventilation; VO2 – oxygen consumption; Δ double product – peak minus baseline heart rate x systolic blood pressure product; Δ PETCO2 – anaerobic threshold minus baseline end-tidal carbon dioxide partial pressure.

Supplementary Table 2. Univariable Cox regression for predicting adverse events up to 36 months of follow-up.

| Variable* | Wald χ2 | Hazard ratio | 95% CI | p |
| --- | --- | --- | --- | --- |
| Ischemic aetiology | 4.3 | 2.06 | 1.13-3.75 | 0.018 |
| NYHA class II (*vs*. III) | 37.3 | 0.22 | 0.12-0.42 | <0.001 |
| Sinus rhythm | 11.7 | 2.52 | 1.28-4.96 | 0.008 |
| Loop diuretic | 4.2 | 24.93 | 1.14-545.98 | 0.041 |
| Furosemide dose (mg/day) | 43.4 | 1.03 | 1.01-1.04 | <0.001 |
| Aldosterone receptor inhibitor | 5.6 | 2.00 | 1.12-3.54 | 0.018 |
| Urea (mg/dL) | 22.9 | 1.03 | 1.01-1.04 | <0.001 |
| Creatinine (mg/dL) | 15.1 | 3.93 | 1.66-9.26 | 0.001 |
| Glomerular filtration rate (mL/min/1.73 m2) | 10.0 | 0.98 | 0.97-0.99 | 0.001 |
| Sodium (mEq/L) | 62.0 | 0.73 | 0.66-0.81 | <0.001 |
| Gammaglutamyl transferase (U/L) | 36.4 | 1.01 | 1.01-1.02 | <0.001 |
| Lactate dehydrogenase (U/L) | 29.4 | 1.01 | 1.00-1.01 | 0.001 |
| Bilirubin (total) (mg/dL) | 22.3 | 3.73 | 1.59-8.75 | 0.002 |
| NT-proBNP (pg/mL) | 38.3 | 1.01 | 1.00-1.01 | <0.001 |
| Elevated troponin T | 14.3 | 3.54 | 1.54-8.12 | 0.003 |
| LVEDD (mm/m2) | 8.8 | 0.16 | 0.04-0.64 | 0.010 |
| Left ventricular ejection fraction (%) | 26.7 | 1.08 | 1.02-1.14 | 0.005 |
| Right ventricular systolic dysfunction | 37.9 | 7.09 | 3.28-15.33 | <0.001 |
| TR max (m/s) | 6.3 | 1.04 | 1.01-1.08 | 0.025 |
| Cardiopulmonary exercise test duration (min) | 46.3 | 0.78 | 0.72-0.85 | <0.001 |
| Peak HR (min-1) | 17.6 | 0.98 | 0.96-0.99 | <0.001 |
| HR recovery (1st minute) (min-1) | 33.5 | 0.90 | 0.85-0.93 | <0.001 |
| Baseline SBP (mmHg) | 8.2 | 0.97 | 0.95-0.99 | 0.010 |
| Peak SBP (mmHg) | 20.5 | 0.97 | 0.96-0.99 | <0.001 |
| Baseline double product (mmHg/min) | 6.3 | 1.00 | 1.00-1.00 | <0.001 |
| Peak double product (mmHg/min) | 27.2 | 1.00 | 1.00-1.00 | <0.001 |
| Δ double product (mmHg/min) | 26.2 | 1.00 | 1.00-1.00 | <0.001 |
| Peak respiratory exchange ratio | 5.6 | 45.75 | 2.59-808.94 | 0.011 |
| pVO2 (mL/kg/min)*a | 56.8 | 0.78 | 0.71-0.85 | <0.001 |
| pVO2 (% predicted)*a | 69.1 | 0.91 | 0.81-0.94 | <0.001 |
| Circulatory power (mmHg.mL/kg/min) | 48.3 | 0.99 | 0.99-0.99 | <0.001 |
| Peak oxygen pulse (% predicted) | 28.7 | 0.97 | 0.96-0.98 | <0.001 |
| OUES | 49.9 | 0.11 | 0.05-0.27 | <0.001 |
| AT (min) | 44.3 | 0.76 | 0.69-0.84 | <0.001 |
| AT-VO2 (mL/kg/min) | 61.1 | 0.74 | 0.66-0.81 | <0.001 |
| Peak VE/VO2 | 53.7 | 1.12 | 1.08-1.16 | <0.001 |
| VE/VCO2 slope*b | 138.7 | 1.27 | 1.19-1.35 | <0.001 |
| Peak VE/VCO2*b | 76.4 | 1.14 | 1.09-1.19 | <0.001 |
| AT VE/VCO2*b | 78.3 | 1.17 | 1.08-1.23 | <0.001 |
| VE/VCO2 slope/pVO2 (mL/kg/min)-1 | 129.6 | 4.73 | 3.03-7.40 | <0.001 |
| VE/VCO2 slope /circulatory power (mmHg.mL/kg/min)-1 | 122.8 | 5.00 | 3.12-8.31 | <0.001 |
| Baseline PETCO2 (kPa) | 8.21 | 0.52 | 0.30-0.89 | 0.018 |
| AT PETCO2 (kPa)*c | 49.4 | 0.27 | 0.17-0.44 | <0.001 |
| Peak PETCO2 (kPa)*c | 38.3 | 0.35 | 0.23-0.54 | <0.001 |
| Δ PETCO2 (kPa)*c | 84.3 | 0.03 | 0.01-0.07 | <0.001 |
| Heart Failure Survival Score | 51.2 | 0.33 | 0.22-0.49 | <0.001 |

Adverse events: cardiac death, urgent heart transplantation or mechanical circulatory support (n=54). *Variables with p<0.050 in univariate Cox regression are presented.

AT – anaerobic threshold; circulatory power – peak oxygen consumption x systolic blood pressure product; double product – heart rate x systolic blood pressure product; HR – heart rate; HR recovery (1st minute) – peak heart rate minus heart rate at first minute of recovery; LVEDD – left ventricular end-diastolic diameter; min – minute; NT-proBNP – N-terminal pro-B-type natriuretic peptide; NYHA – New York Heart Association; OUES – oxygen uptake efficiency slope15; peak oxygen pulse – peak oxygen consumption / heart rate ratio; PETCO2 – end-tidal carbon dioxide partial pressure; pVO2 – peak oxygen consumption; pVO2 (% predicted) – based on Wasserman and Hansen formula; respiratory exchange ratio – ratio between carbon dioxide production and oxygen consumption; SBP – systolic blood pressure; TR max – maximal tricuspid regurgitation velocity; VCO2 – carbon dioxide production; VE – minute ventilation; VO2 – oxygen consumption; Δ double product – peak minus baseline heart rate x systolic blood pressure product; Δ PETCO2 – anaerobic threshold minus baseline end-tidal carbon dioxide partial pressure; 95% CI – 95% confidence interval.

**Univariable and multivariable Cox regression**

All variables presented in the Supplementary Table 1 were tested as potential predictors of adverse outcome. Variables showing a significant association with the occurrence of the studied endpoint (p<0.05) were included in a multivariable model. To avoid multicollinearity, when an association between two variables was identified, only the variable with stronger association with the studied endpoint and judged to be clinically more important was entered in the multivariable model. Of the variables peak oxygen consumption, percentage achieved of the predicted peak oxygen consumption, ventilatory efficiency slope (entire exercise), peak ventilatory efficiency, ventilatory efficiency at the anaerobic threshold, end-tidal carbon dioxide partial pressure at the anaerobic threshold, end-tidal carbon dioxide partial pressure at peak exercise, and exercise variation of end-tidal carbon dioxide partial pressure, only peak oxygen consumption, ventilatory efficiency slope (entire exercise), and exercise variation of end-tidal carbon dioxide partial pressure were entered in the multivariable model, to avoid multicollinearity.

Proportional hazards assumption of Cox regression was tested with a formal significance test based on standardized Schoenfeld residuals. Overall C-index was calculated for each multivariable model.The area under the receiving operating characteristics curve was calculated individually for each variable included in the multivariable models.
