# Supplementary material
Source: Elsevier journal article supplement (https://www.sciencedirect.com/science/article/pii/S2174204918300746)
Supplement: mmc2 [file S2174204918300746:mmc2.doc]

**Supplementary Figures**


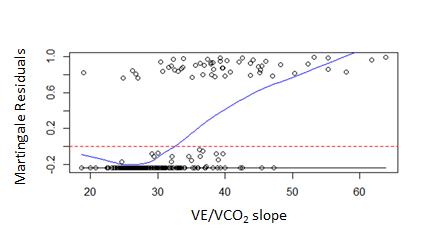


**Supplementary Figure 1.** Estimation of the cut-off value VE/VCO2 slope 32.0 for identifying patients at higher risk at 36 months of follow-up, using the martingale residuals.


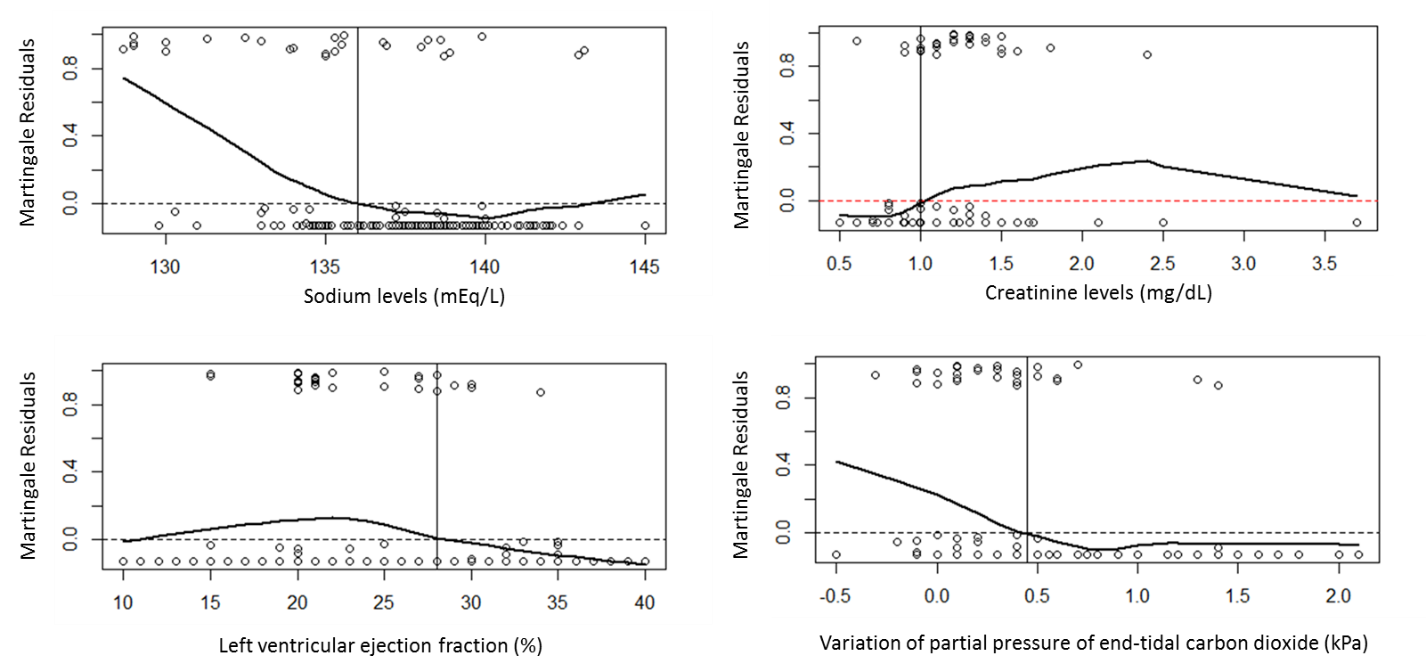


**Supplementary Figure 2.** Estimation of the cut-off values of sodium levels, creatinine levels, left ventricular ejection fraction and variation of the end-tidal carbon dioxide partial pressure (excluding patients with VE/VCO2 slope ≥39.0), for identifying patients at higher risk at 36 months of follow-up, using the martingale residuals.


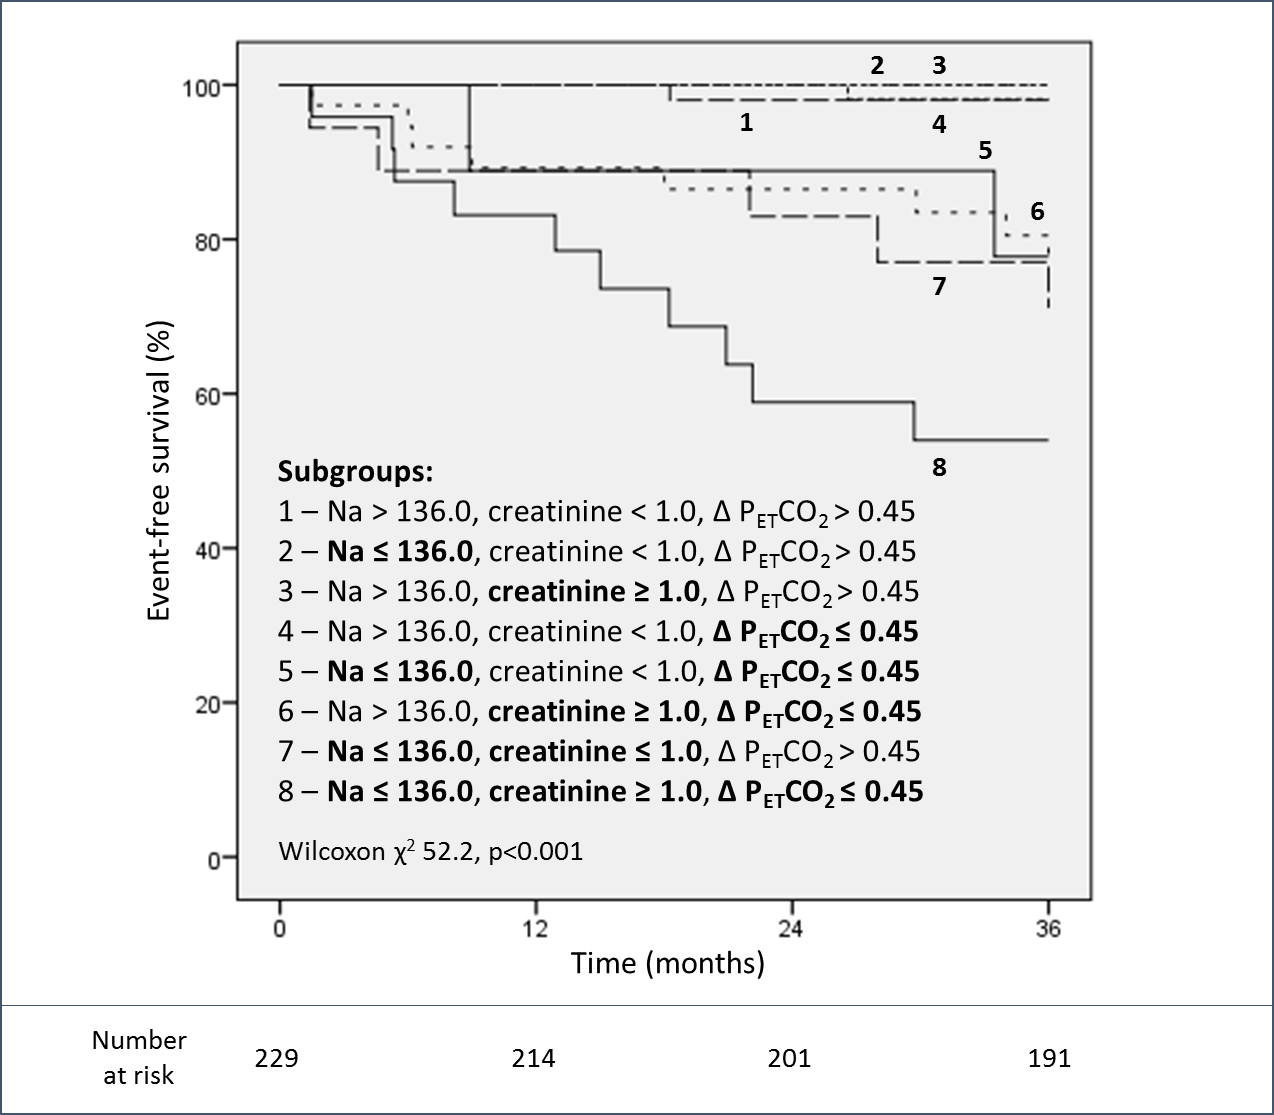


**Supplementary Figure 3.** Estimated survival free from adverse events (cardiac death, urgent heart transplantation or need for mechanical circulatory support) curves up to 36 months of follow-up. Creatinine – creatinine levels (mg/dL); Na – sodium levels (mEq/L); Δ PETCO2 – variation of end-tidal carbon dioxide partial pressure (kPa).
